# Supplementary material for: Male X-linked genes in Drosophila melanogaster are compensated independently of the Male-Specific Lethal complex
Source: PubMed Central journal article supplement (PMC4176495; doi:10.1186/1756-8935-6-35), 2013-10-26

A

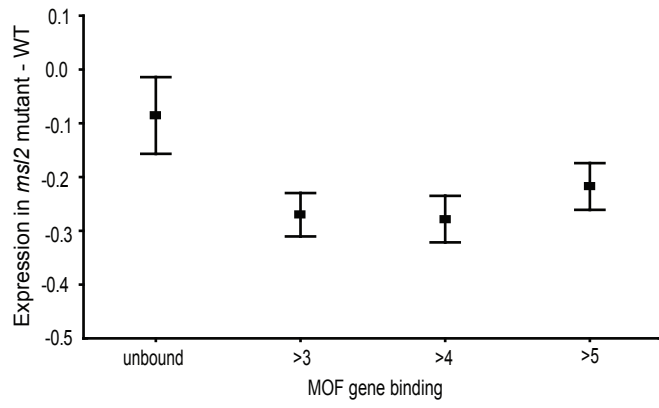

B

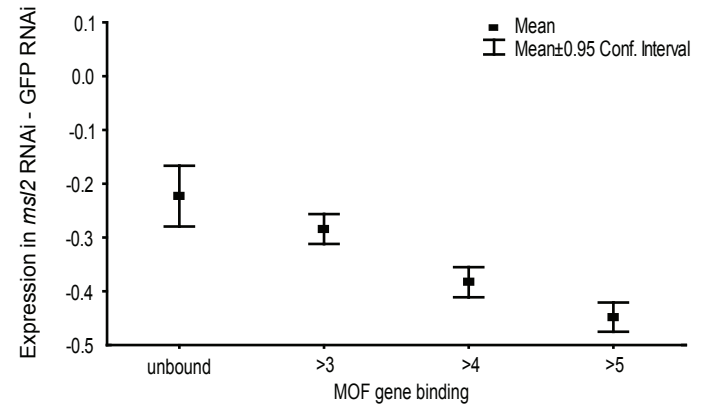

C

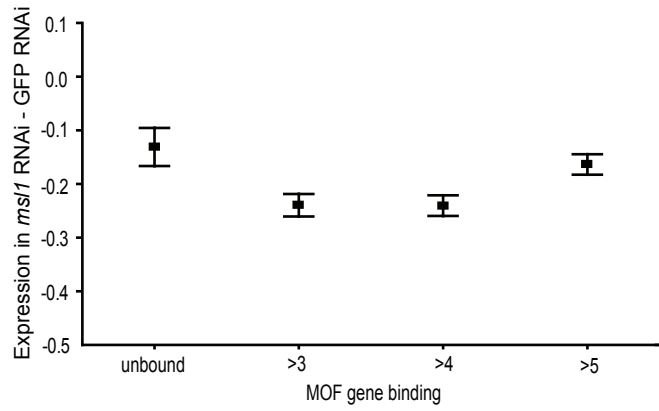

D

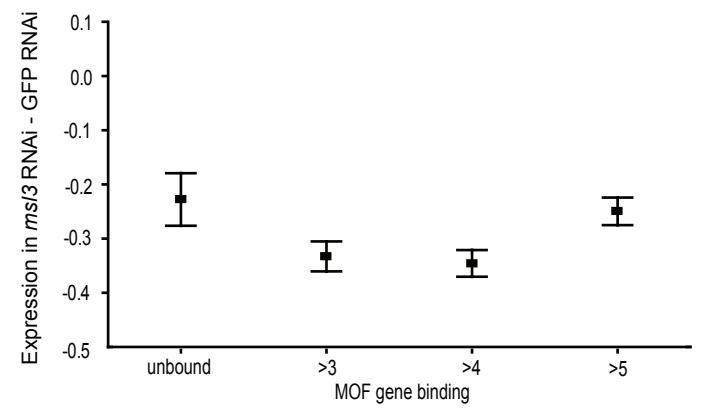

Supplement: 1756-8935-6-35-S2.pdf [file 1756-8935-6-35-S2.pdf]
